# Supplementary material
Source: Research Square preprint supplement (doi:10.21203/rs.3.rs-9246829/v1)
Supplement: Supplementary file 2 [file e79975c4430c02218b693211.pdf]

## Supplementary Material

### **Pathogenic missense variants in *SLC2A1* (GLUT1) misroute to lysosomes in endothelial cells: insights into molecular pathology of GLUT1 deficiency**

Sara Lazzari<sup>1,2</sup>, Agnese Giovannetti<sup>3</sup>, Francesco Petrizzelli<sup>3</sup>, Veronica De Paolis<sup>2</sup>, Francesca Matarazzo<sup>2</sup>, Tommaso Biagini<sup>3</sup>, Tommaso Mazza<sup>3</sup>, Chiara Parisi<sup>2\*</sup>, Viviana Caputo<sup>4\*</sup>

1. Clinical Genomics Laboratory Fondazione IRCCS Casa Sollievo Della Sofferenza, S. Giovanni Rotondo (FG), Italy
2. Institute of Biochemistry and Cell Biology, CNR-National Research Council, Monterotondo Scalo (RM), Italy
3. UOS Computational Biology and Bioinformatics, Fondazione Policlinico Universitario A. Gemelli, IRCCS, Rome, Italy
4. Department of Experimental Medicine, Sapienza University of Rome, Rome, Italy

Correspondence to:

Chiara Parisi - [chiara.parisi@cnr.it](mailto:chiara.parisi@cnr.it)

Viviana Caputo - [viviana.caputo@uniroma1.it](mailto:viviana.caputo@uniroma1.it)

\*co-last and co-corresponding authors

## Contents

|                                |    |
|--------------------------------|----|
| <b>Supplementary Table S1.</b> | 3  |
| <b>Supplementary Table S2.</b> | 4  |
| <b>Supplementary Fig. S1.</b>  | 5  |
| <b>Supplementary Fig. S2.</b>  | 7  |
| <b>Supplementary Fig. S3.</b>  | 8  |
| <b>Supplementary Fig. S4.</b>  | 9  |
| <b>Supplementary Fig. S5.</b>  | 11 |
| <b>Supplementary Fig. S6.</b>  | 12 |
| <b>Supplementary Fig. S7.</b>  | 13 |
| <b>Supplementary Fig. S8.</b>  | 15 |
| <b>Supplementary Fig. S9.</b>  | 17 |
| <b>Supplementary Fig. S10.</b> | 21 |
| <b>Supplementary Fig. S11.</b> | 22 |

**Supplementary Table S1.**

List of the selected GLUT1 missense variants, specifying the amino acid substitution on protein sequence (NP\_006507.2), the nucleotide substitution found in the coding sequence (NM\_006516.4), and the relative primer pairs used for mutagenesis experiments shown in the 5' to 3' direction.

| <b>GLUT1 protein variant</b> | <b>SLC2A1 cDNA variant</b> | <b>Forward Primer</b>        | <b>Reverse Primer</b>        |
|------------------------------|----------------------------|------------------------------|------------------------------|
| p.(N34S)                     | c.101A>G                   | TGGAGTCATCAGTGCCCCCAGAAG     | GTGTTGTAGCCAAACTGCAGGGAGC    |
| p.(R126L)                    | c.377G>T                   | CTGATCCTGGGCCTCTTCATCATCGGTG | CATCTCAAAGGACTTGCCCAGTTTCGAG |
| p.(R153C)                    | c.457C>T                   | CCACAGCCCTTTGTGGGGCCCTG      | GTGACACTTCACCCACATACATGGG    |
| p.(R223P)                    | c.668G>C                   | AACGAGGAGAACCCGGCCAAGAGTG    | GCGGTTGATGAGCAGGAAGCGGGGAC   |
| p.(R223W)                    | c.667C>T                   | AACGAGGAGAAGTGGGCCAAGAGTG    | GCGGTTGATGAGCAGGAAGCGGGGAC   |
| p.(Q283R)                    | c.848A>G                   | GCTGTCCCAGCGGCTGTCTGGCATC    | TGCAGCACCACAGCGATGAGGATG     |
| p.(I404V)                    | c.1210A>G                  | CGTCCAGCTGCCGTTGCCGTTGC      | TGGACCCTGGCTGAAGAGTTCAG      |
| p.(P485L)                    | c.1454C>T                  | AGCTGTTCCATCTCCTGGGGGCTG     | CCTCGGGTGTCTTGTCACCTTGGC     |

### Supplementary Table S2.

Clinical and experimental features of the GLUT1 missense variants reported in this work. We reported classification of variants from clinical databases, namely ClinVar and HGMD, including associated phenotypes, localization in GLUT1 protein domains, and functional evidence relevant to this work.

| GLUT1 protein variant | SLC2A1 cDNA variant | ClinVar     | HGMD <sup>a</sup>                                 | Protein domain <sup>b</sup> | Functional evidence <sup>c</sup>                                                                                                                  |
|-----------------------|---------------------|-------------|---------------------------------------------------|-----------------------------|---------------------------------------------------------------------------------------------------------------------------------------------------|
| p.(N34S)              | c.101A>G            | Pathogenic  | DM (GLUT1 DS)                                     | Extracellular               | Reduced RBC uptake [12,21,29,41]                                                                                                                  |
| p.(R126L)             | c.377G>T            | Pathogenic  | DM (GLUT1 DS)                                     | TM4                         | -Reduced uptake in RBC, Xenopus oocytes, CHO-K1 cells [34,39-40];<br>-Reduced plasma membrane expression in Xenopus oocytes, CHO-K1 cells [34,40] |
| p.(R153C)             | c.457C>T            | Pathogenic  | DM (GLUT1 DS)                                     | Cytoplasmic                 | Reduced RBC uptake [12,34-36]                                                                                                                     |
| p.(R223P)             | c.668G>C            | Risk factor | DM (GLUT1 DS)                                     | Cytoplasmic                 | Reduced uptake in Xenopus oocytes and in Rat2 cells [20,37-38]                                                                                    |
| p.(R223W)             | c.667C>T            | Pathogenic  | DM (GLUT1 DS)                                     | Cytoplasmic                 | Reduced uptake in Rat2 cells [37]                                                                                                                 |
| p.(Q283R)             | c.848A>G            | Pathogenic  | DM (Epilepsy and/or neurodevelopmental disorders) | TM7                         | no functional evidence                                                                                                                            |
| p.(I404V)             | c.1210A>G           | VUS         | not reported                                      | TM11                        | no functional evidence                                                                                                                            |
| p.(P485L)             | c.1454C>T           | Pathogenic  | DM (GLUT1 DS)                                     | Cytoplasmic                 | Reduced RBC uptake [34], mislocalization [42-43]                                                                                                  |

<sup>a</sup> DM indicate variants classified as Disease-Mutation in HGMD

<sup>b</sup> TM indicate variant localization in a TransMembrane alpha-helix, followed by the domain number

<sup>c</sup> RBC, Red Blood Cells, refers to the cellular type in which reduced glucose uptake was observed

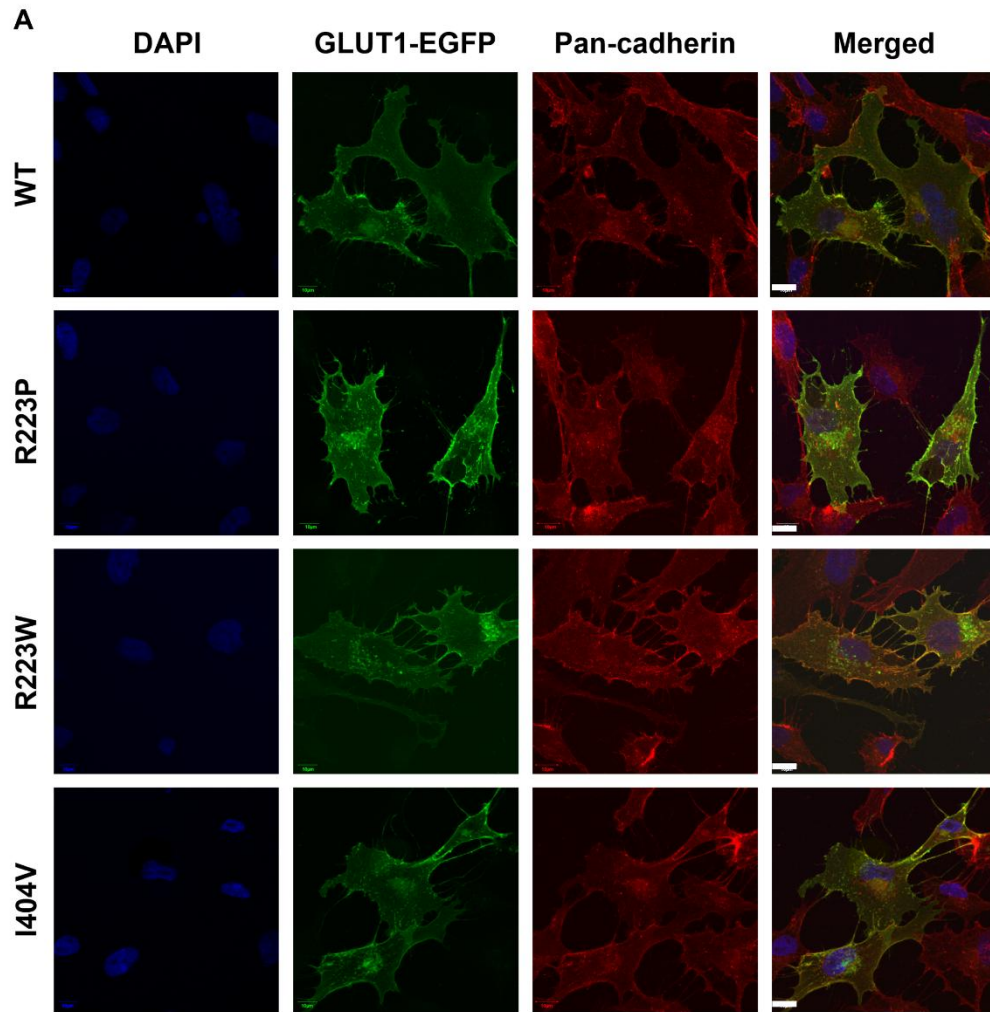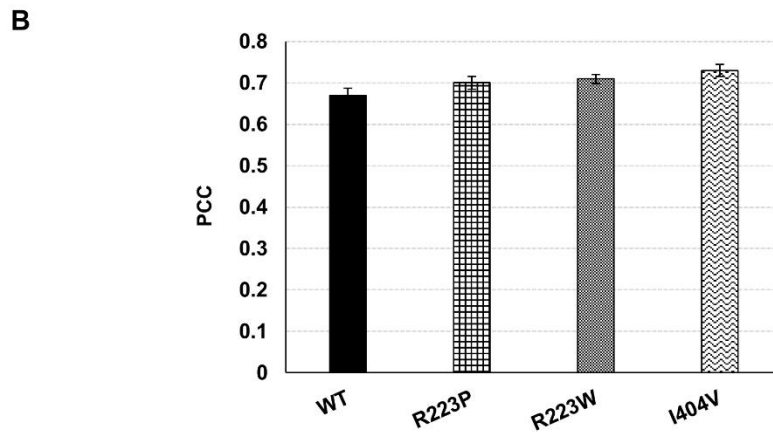

**Supplementary Fig. S1.**

(A) Representative images of immunofluorescence (IF) staining detecting GLUT1-EGFP localization (green) in hCMEC/D3 cells transfected for 48 h with the following constructs: pEGFPN1-GLUT1-WT, pEGFPN1-GLUT1-R223P, pEGFPN1-GLUT1-R223W, and pEGFPN1-GLUT1-I404V. DAPI (blue) was used to visualize nuclei, cadherins staining (red) detected plasma membranes. Images are maximum intensity projections of z-stacks. Scale bars 10  $\mu$ m. (B) Quantification of colocalization between GLUT1-EGFP and cadherins signals. For each experimental condition, Pearson's correlation coefficient (PCC) was calculated within the areas of colocalization using Fiji. PCC was recorded for each cell and reported as mean  $\pm$  sem on 30 cells. Differences between WT and mutants were analyzed by unpaired Student's t-test. \* $p < 0.01$

A

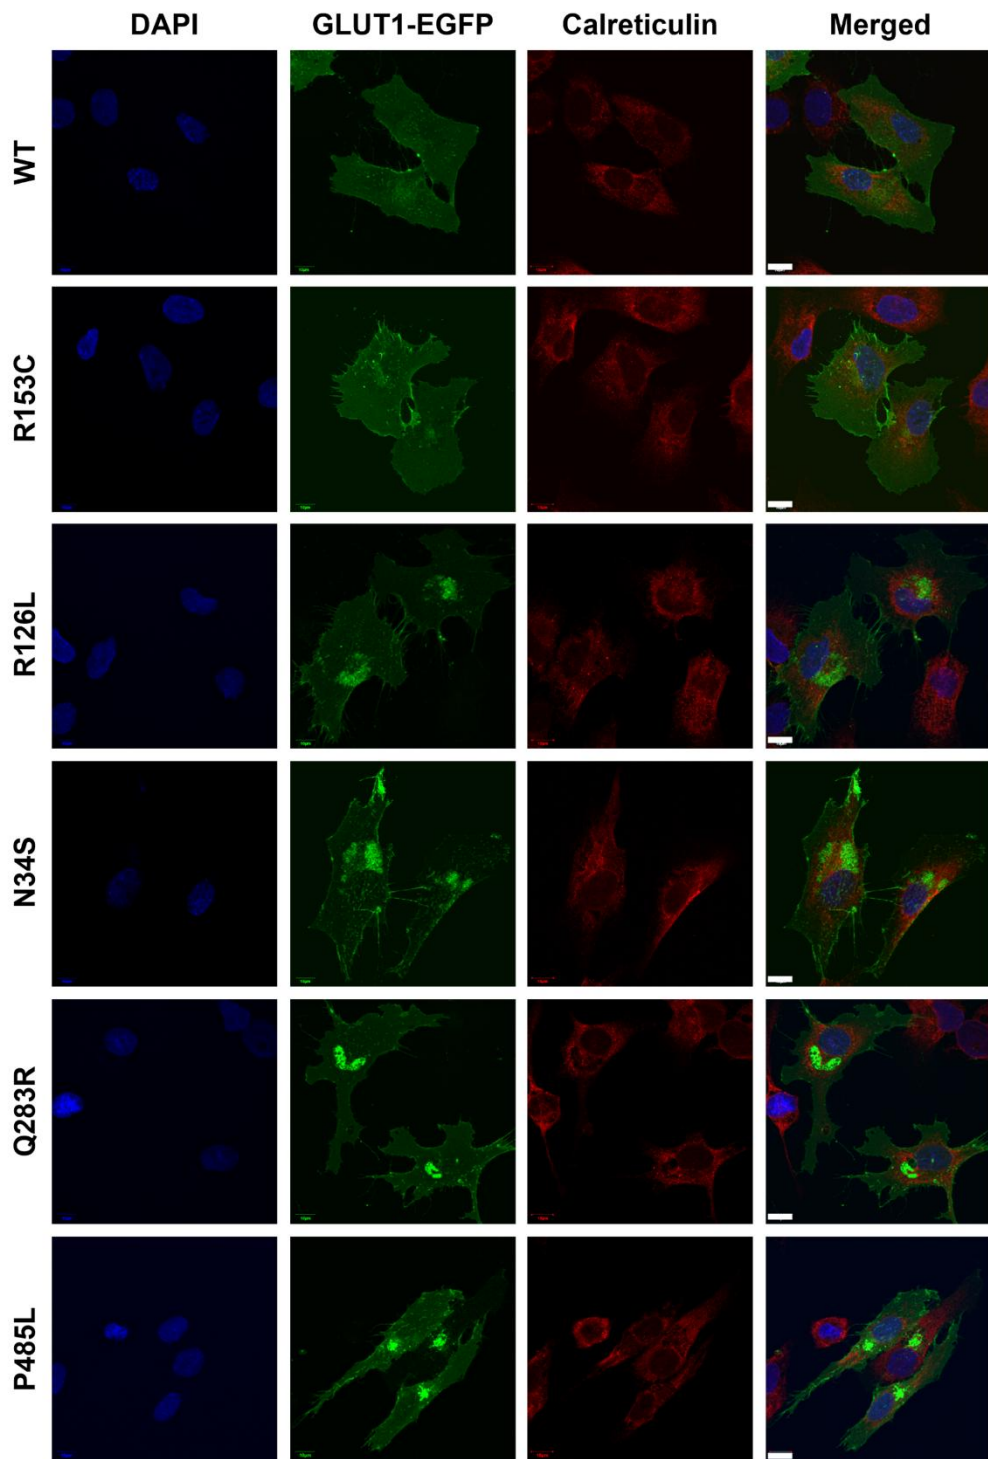

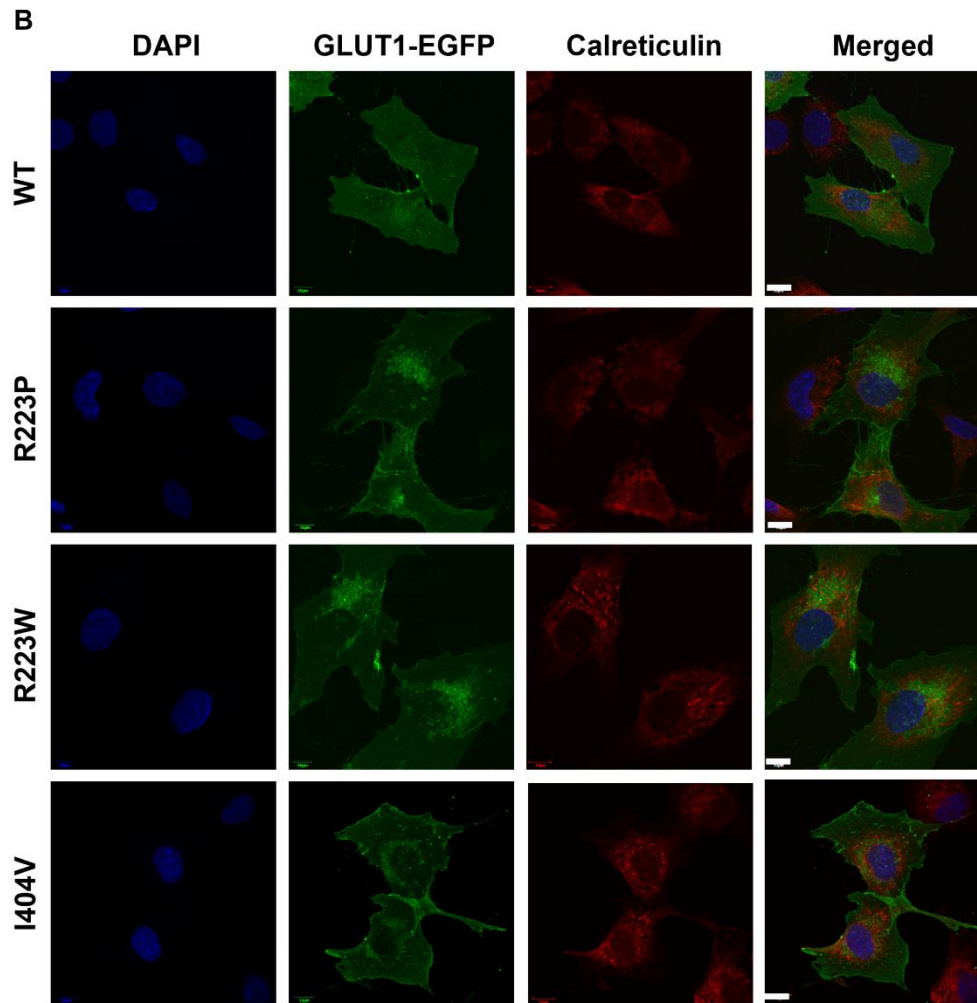

**Supplementary Fig. S2.**

(A) Representative images of immunofluorescence (IF) staining detecting GLUT1-EGFP localization (green) in hCMEC/D3 cells transfected for 48 h with the following constructs: pEGFPN1-GLUT1-WT, pEGFPN1-GLUT1-R153C, pEGFPN1-GLUT1-R126L, pEGFPN1-GLUT1-N34S, pEGFPN1-GLUT1-Q283R, and pEGFPN1-GLUT1-P485L. DAPI (blue) was used to visualize nuclei, Calreticulin staining (red) detected endoplasmic reticulum. Images are maximum intensity projections of z-stacks. Scale bars 10  $\mu$ m. (B) Representative images of immunofluorescence (IF) staining detecting GLUT1-EGFP localization (green) in hCMEC/D3 cells transfected for 48 h with the following constructs: pEGFPN1-GLUT1-WT, pEGFPN1-GLUT1-R223P, pEGFPN1-GLUT1-R223W, and pEGFPN1-GLUT1-I404V. DAPI (blue) was used to visualize nuclei, Calreticulin staining (red) detected endoplasmic reticulum. Images are maximum intensity projections of z-stacks. Scale bars 10  $\mu$ m.

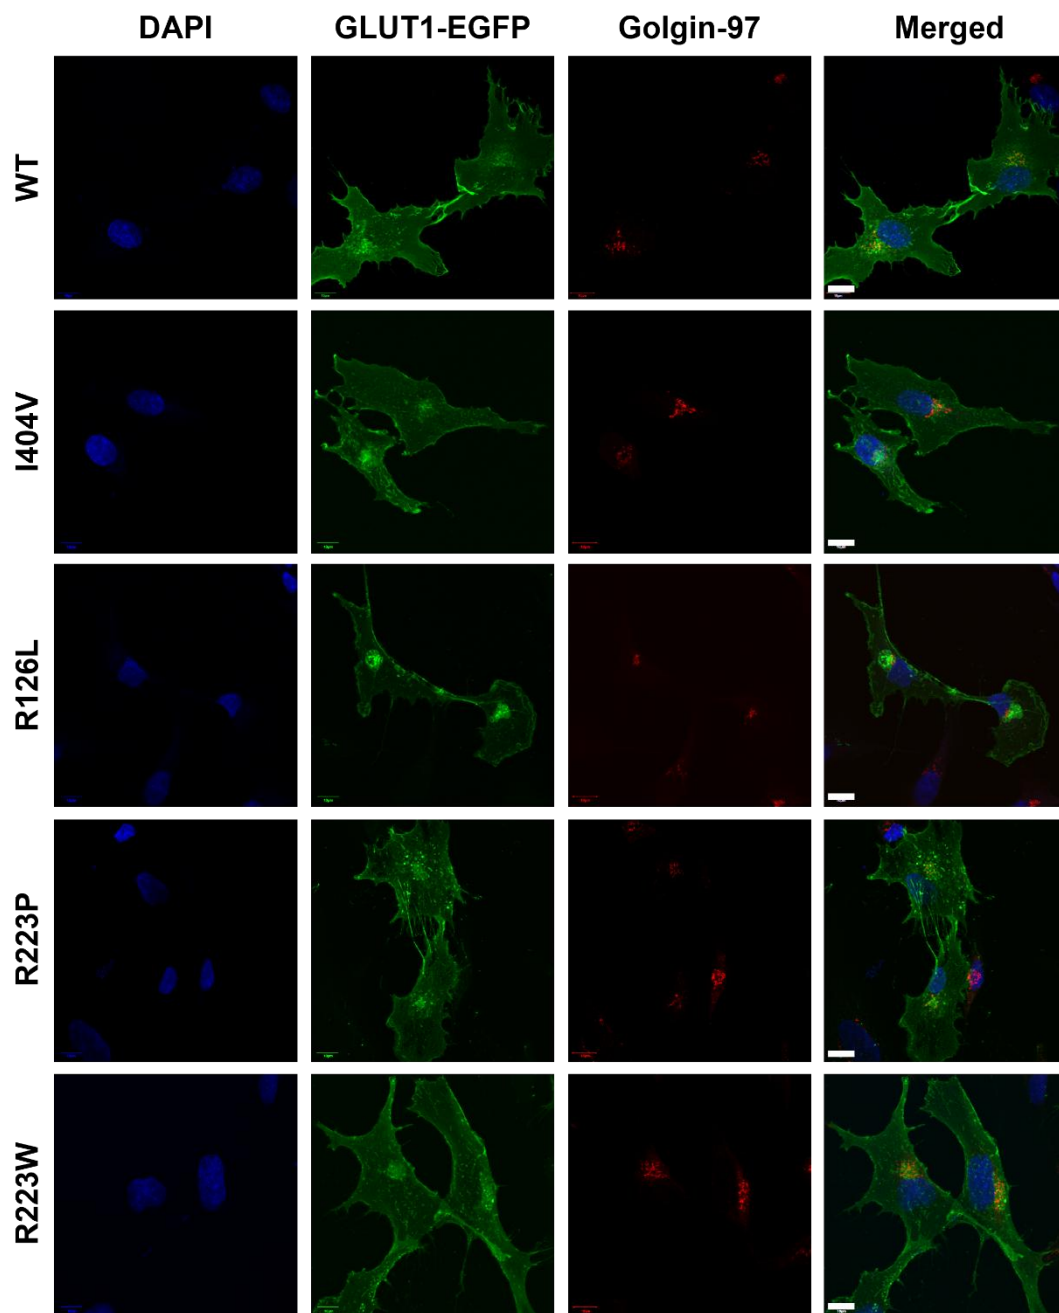

**Supplementary Fig. S3.**

Representative images of immunofluorescence (IF) staining detecting GLUT1-EGFP localization (green) in hCMEC/D3 cells transfected for 48 h with the following constructs: pEGFPN1-GLUT1-WT, pEGFPN1-GLUT1-I404V, pEGFPN1-GLUT1-R126L, pEGFPN1-GLUT1-R223P, and pEGFPN1-GLUT1-R223W. DAPI (blue) was used to visualize nuclei, Golgin-97 staining (red) detected Golgi apparatus. Images are maximum intensity projections of z-stacks. Scale bars 10  $\mu$ m.

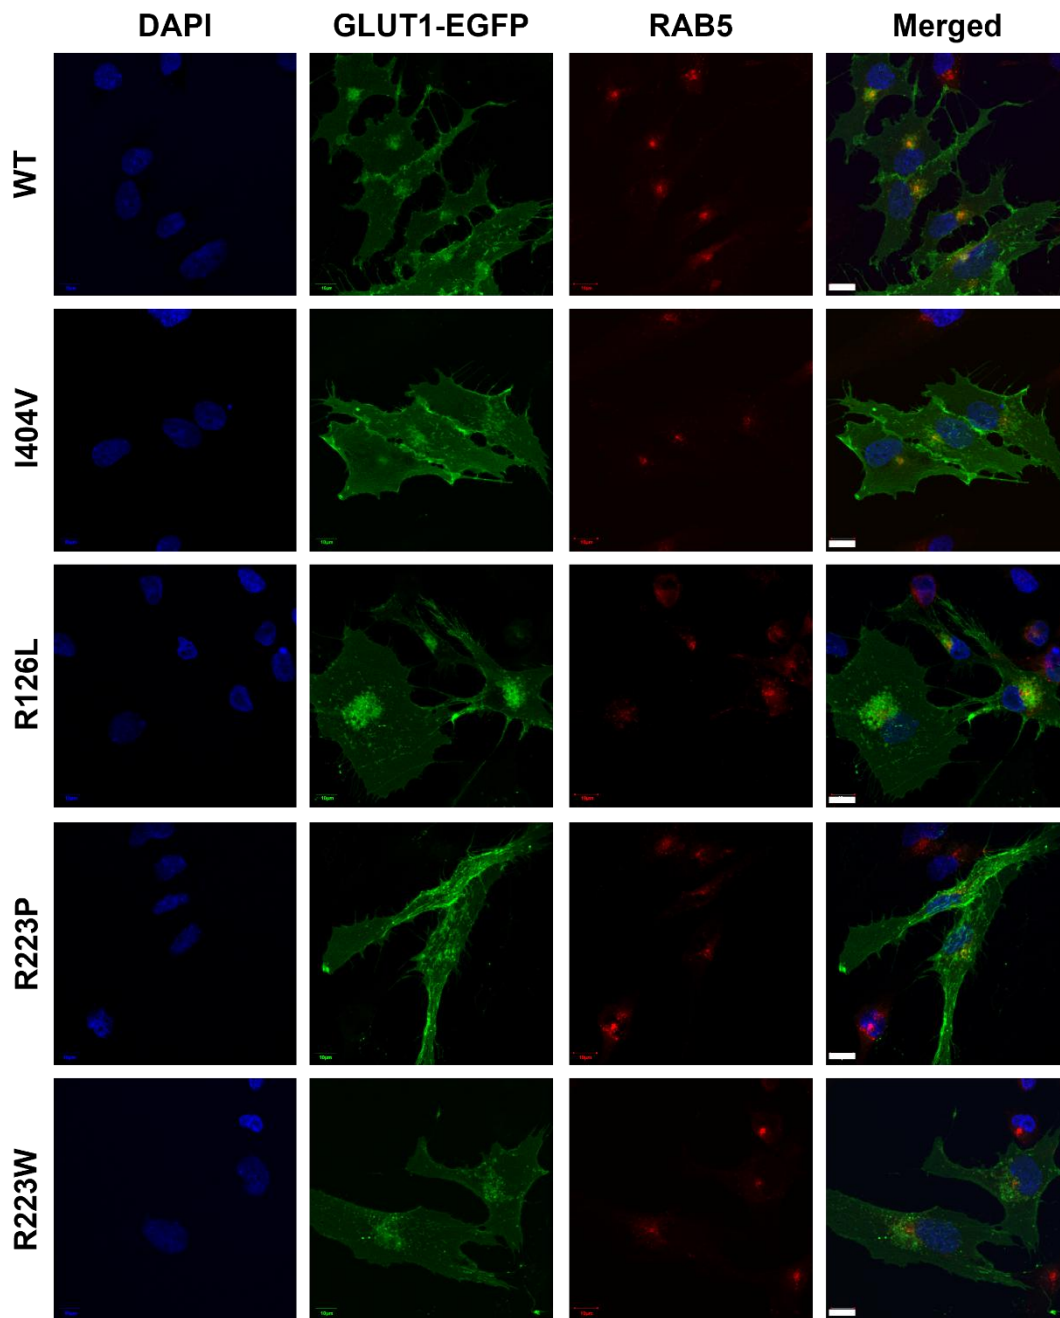

**Supplementary Fig. S4.**

Representative images of immunofluorescence (IF) staining detecting GLUT1-EGFP localization (green) in hCMEC/D3 cells transfected for 48 h with the following constructs: pEGFPN1-GLUT1-WT, pEGFPN1-GLUT1-I404V, pEGFPN1-GLUT1-R126L, pEGFPN1-GLUT1-R223P, and pEGFPN1-GLUT1-R223W. DAPI (blue) was used to visualize nuclei, RAB5 staining (red) detected early endosomes. Images are maximum intensity projections of z-stacks. Scale bars 10  $\mu$ m.

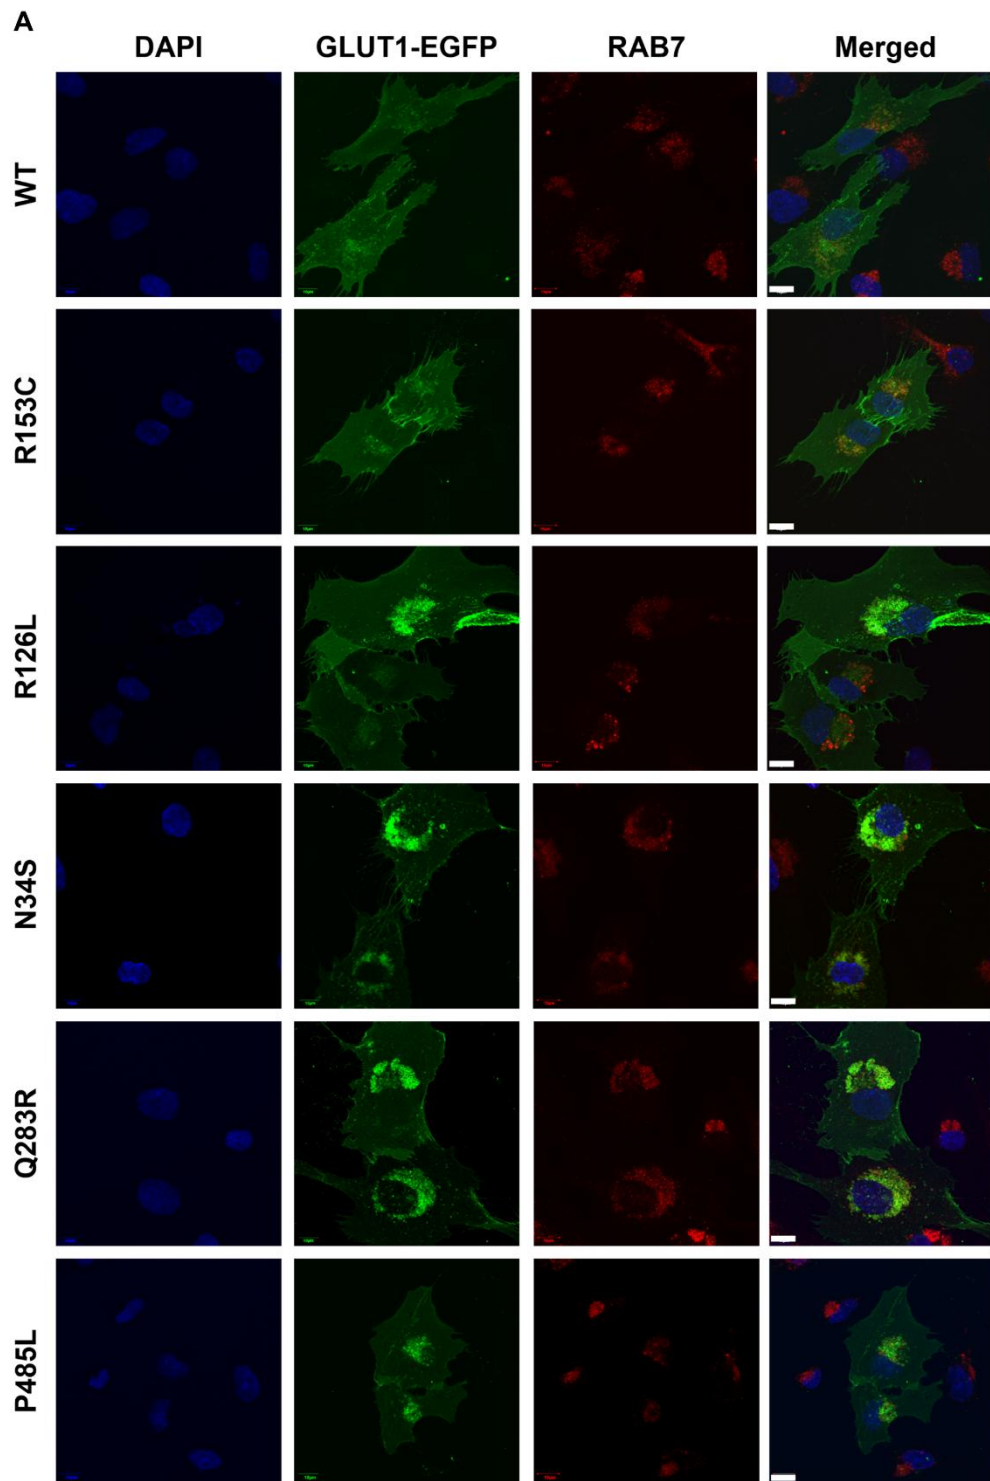

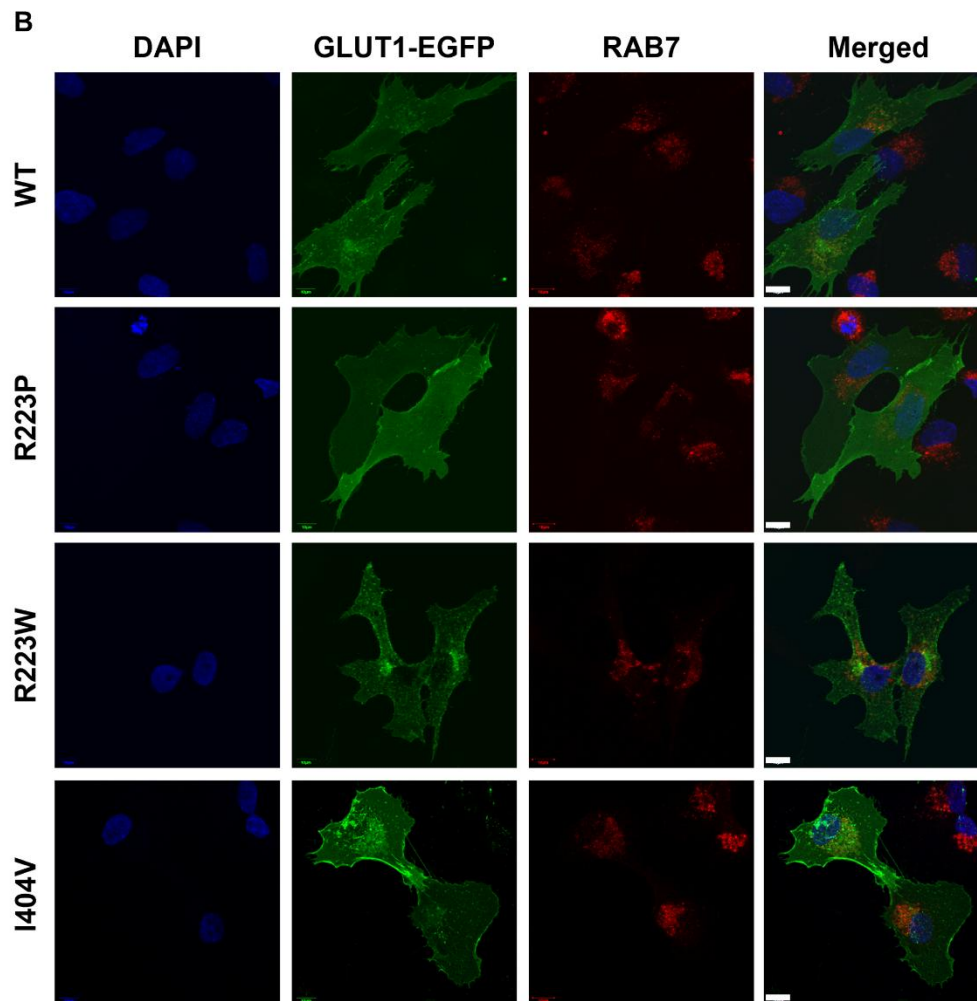

**Supplementary Fig. S5.**

(A) Representative images of immunofluorescence (IF) staining detecting GLUT1-EGFP localization (green) in hCMEC/D3 cells transfected for 48 h with the following constructs: pEGFPN1-GLUT1-WT, pEGFPN1-GLUT1-R153C, pEGFPN1-GLUT1-R126L, pEGFPN1-GLUT1-N34S, pEGFPN1-GLUT1-Q283R, and pEGFPN1-GLUT1-P485L. DAPI (blue) was used to visualize nuclei, RAB7 staining (red) detected late endosomes. Images are maximum intensity projections of z-stacks. Scale bars 10  $\mu$ m. (B) Representative images of immunofluorescence (IF) staining detecting GLUT1-EGFP localization (green) in hCMEC/D3 cells transfected for 48 h with the following constructs: pEGFPN1-GLUT1-WT, pEGFPN1-GLUT1-R223P, pEGFPN1-GLUT1-R223W, and pEGFPN1-GLUT1-I404V. DAPI (blue) was used to visualize nuclei, RAB7 staining (red) detected late endosomes. Images are maximum intensity projections of z-stacks. Scale bars 10  $\mu$ m.

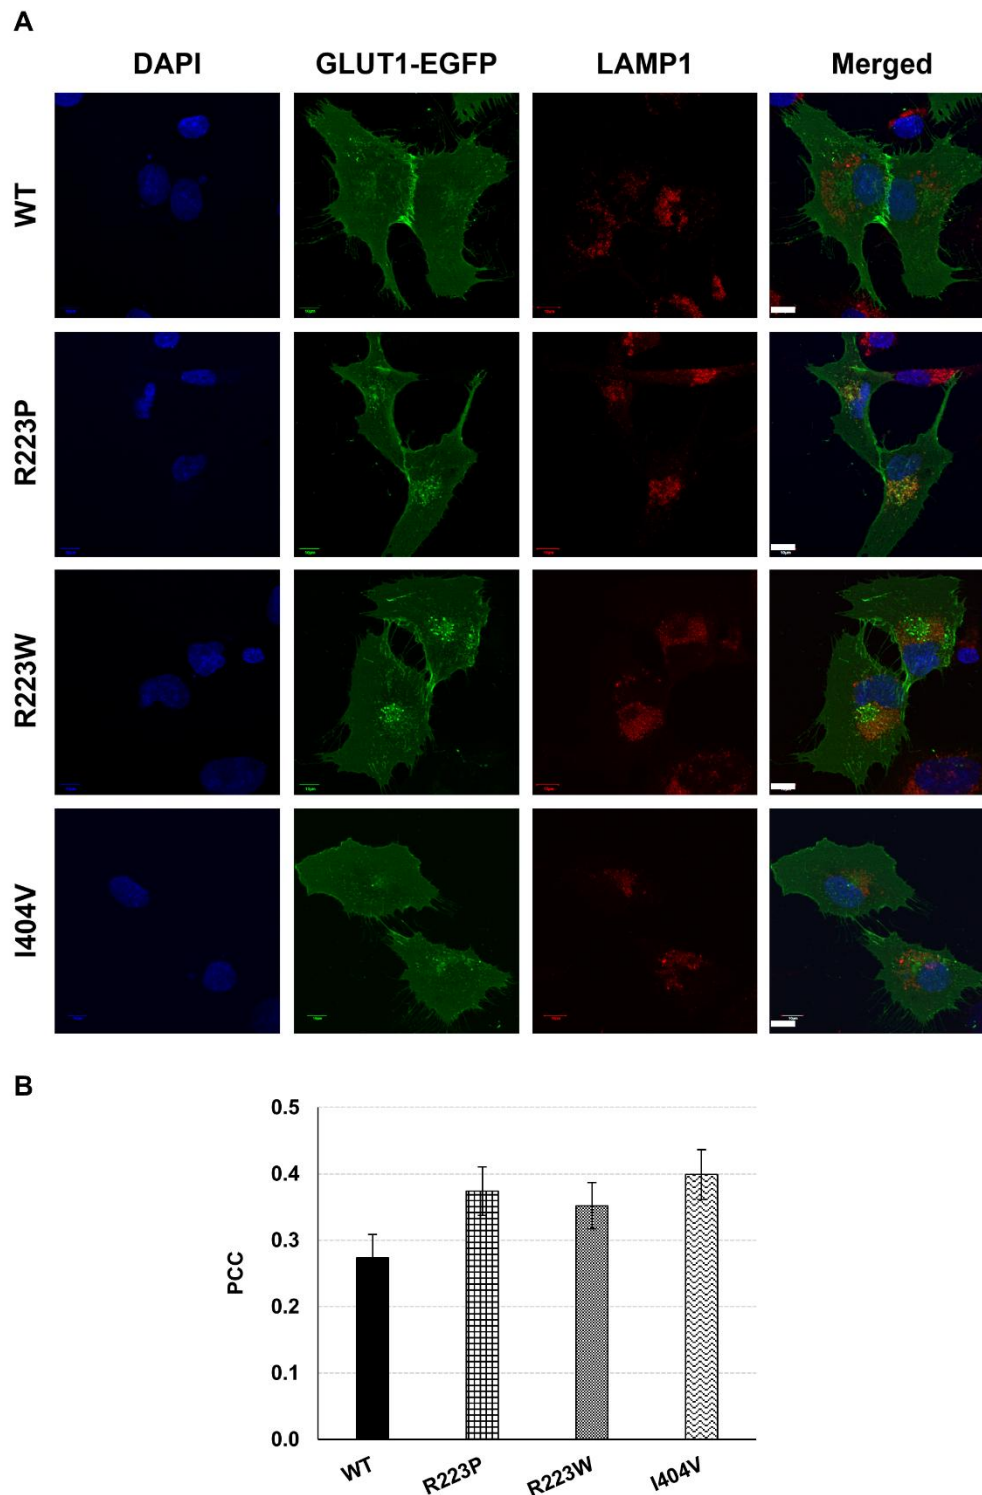

**Supplementary Fig. S6.**

(A) Representative images of immunofluorescence (IF) staining detecting GLUT1-EGFP localization (green) in hCMEC/D3 cells transfected for 48 h with the following constructs: pEGFPN1-GLUT1-WT, pEGFPN1-GLUT1-R223P, pEGFPN1-GLUT1-R223W, and pEGFPN1-GLUT1-I404V. DAPI (blue) was used to visualize nuclei, LAMP1 staining (red) detected lysosomes. Images are maximum intensity projections of z-stacks. Scale bars 10  $\mu$ m. (B) Quantification of colocalization between GLUT1-EGFP and LAMP1 signals. For each experimental condition, Pearson's correlation coefficient (PCC) was calculated within the areas of colocalization using Fiji. PCC was recorded for each cell and reported as mean  $\pm$  sem on 30 cells. Differences between WT and mutants were analyzed by unpaired Student's t-test. \* $p < 0.01$

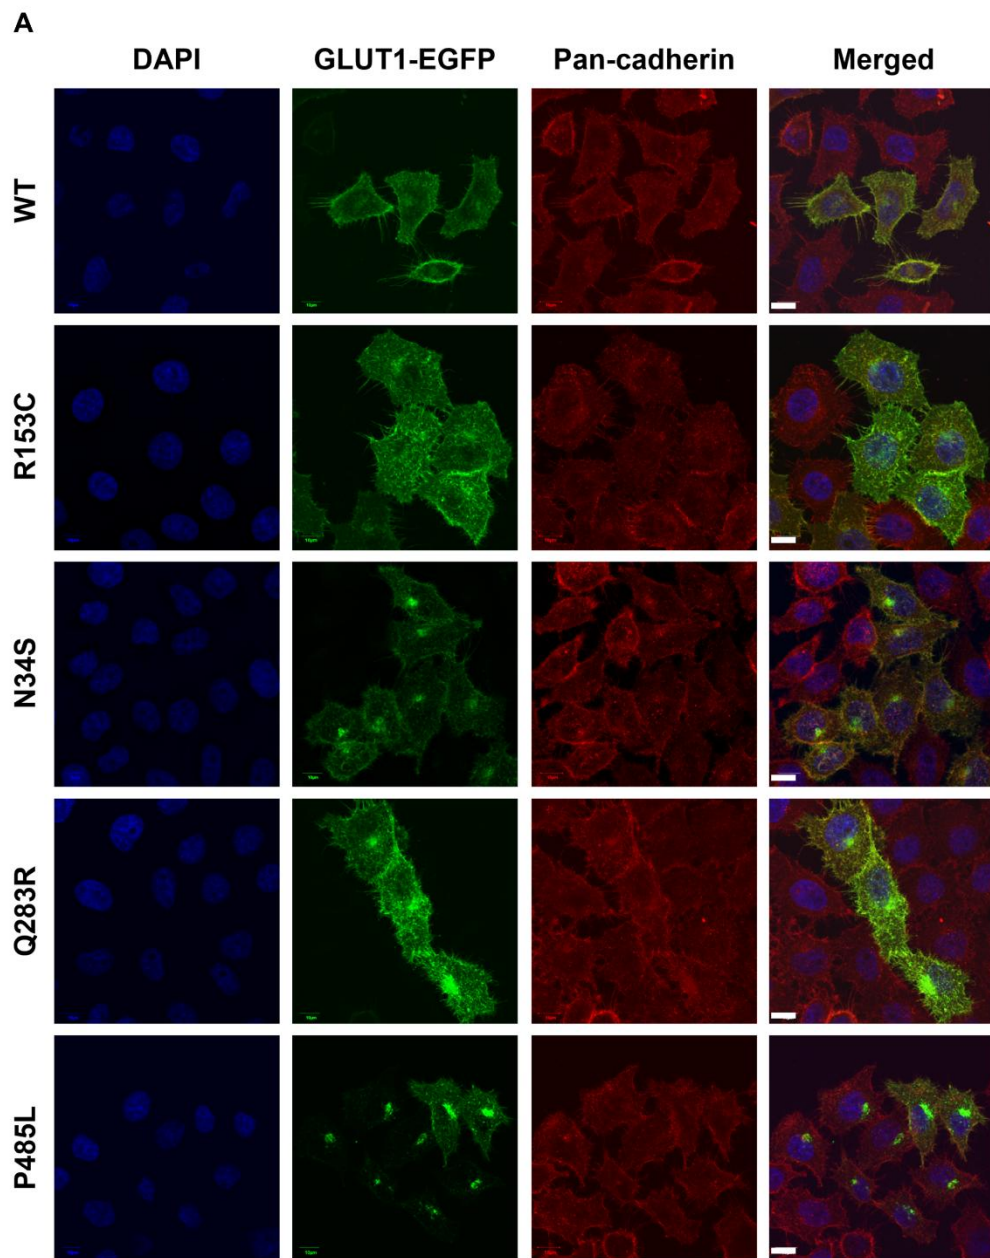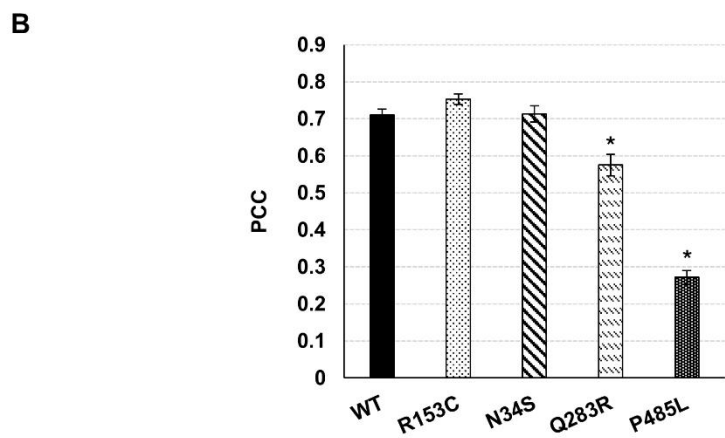

**Supplementary Fig. S7.**

(A) Representative images of immunofluorescence (IF) staining detecting GLUT1-EGFP localization (green) in HeLa cells transfected for 48 h with the following constructs: pEGFPN1-GLUT1-WT, pEGFPN1-GLUT1-R153C, pEGFPN1-

GLUT1-N34S, pEGFPN1-GLUT1-Q283R, and pEGFPN1-GLUT1-P485L. DAPI (blue) was used to visualize nuclei, cadherins staining (red) detected plasma membranes. Images are maximum intensity projections of z-stacks. Scale bars 10  $\mu$ m. **(B)** Quantification of colocalization between GLUT1-EGFP and cadherins signals. For each experimental condition, Pearson's correlation coefficient (PCC) was calculated within the areas of colocalization using Fiji. PCC was recorded for each cell and reported as mean  $\pm$  sem on 30 cells. Differences between WT and mutants (R153C, N34S, Q283R, P485L) were analyzed by unpaired Student's t-test. \* $p < 0.01$

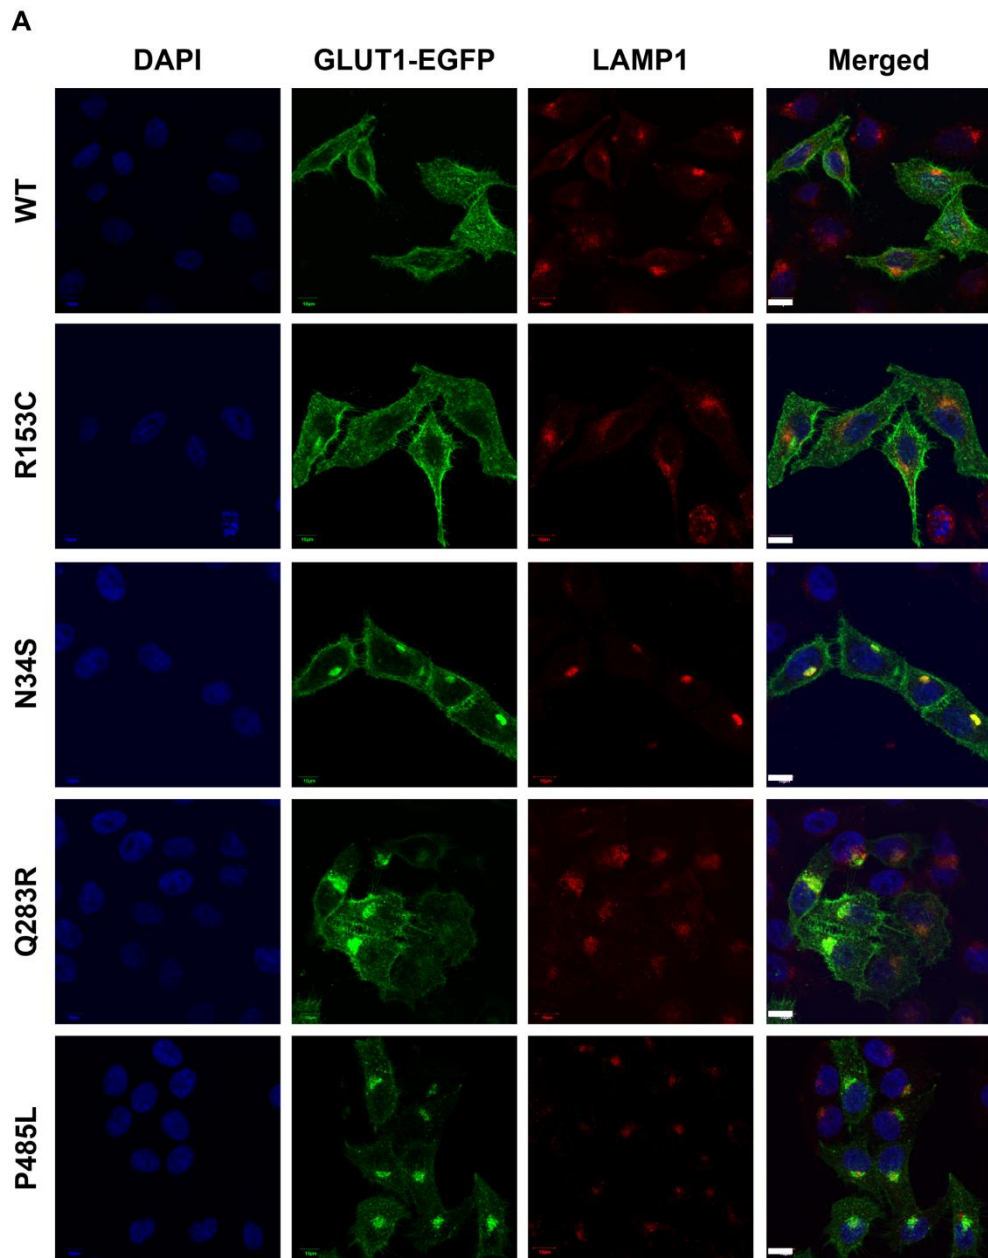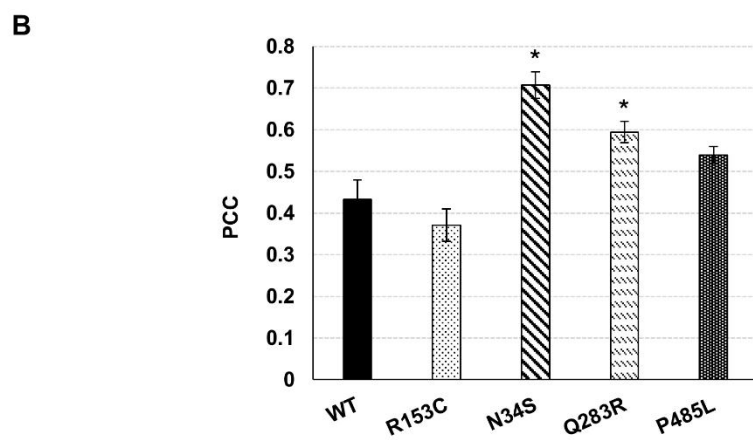

**Supplementary Fig. S8.**

(A). Representative images of immunofluorescence (IF) staining detecting GLUT1-EGFP localization (green) in HeLa cells transfected for 48 h with the following constructs: pEGFPN1-GLUT1-WT, pEGFPN1-GLUT1-R153C, pEGFPN1-

GLUT1-N34S, pEGFPN1-GLUT1-Q283R, and pEGFPN1-GLUT1-P485L. DAPI (blue) was used to visualize nuclei, LAMP1 staining (red) detected lysosomes. Images are maximum intensity projections of z-stacks. Scale bars 10  $\mu$ m. **(B)** Quantification of colocalization between GLUT1-EGFP and LAMP1 signals. For each experimental condition, Pearson's correlation coefficient (PCC) was calculated within the areas of colocalization using Fiji. PCC was recorded for each cell and reported as mean  $\pm$  sem on 30 cells. Differences between WT and mutants (R153C, N34S, Q283R, P485L) were analyzed by unpaired Student's t-test. \* $p < 0.01$

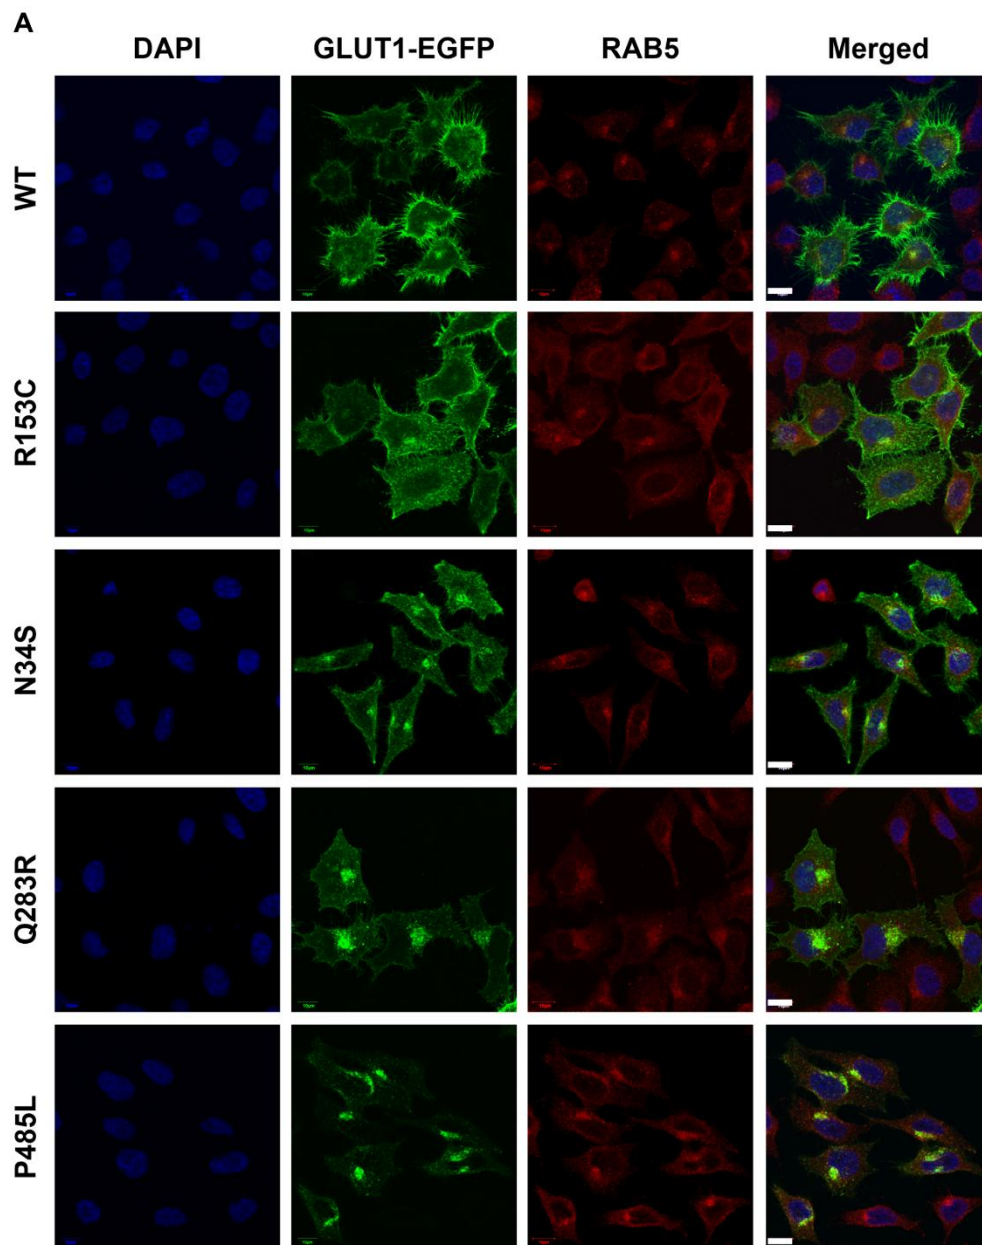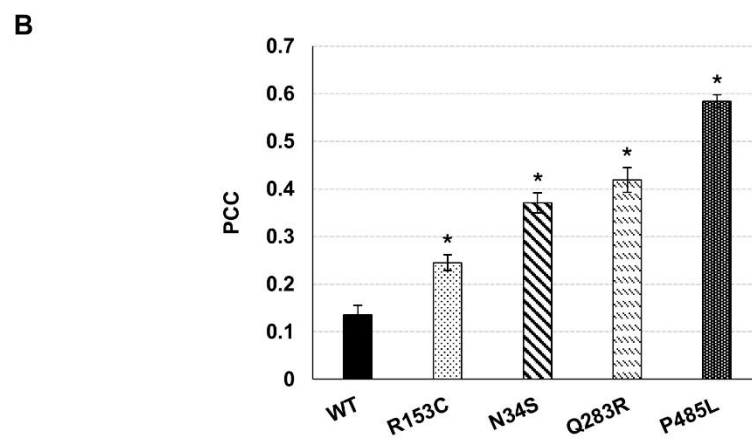

Supplementary Fig. S9.

(A) Representative images of immunofluorescence (IF) staining detecting GLUT1-EGFP localization (green) in HeLa cells transfected for 48 h with the following constructs: pEGFPN1-GLUT1-WT, pEGFPN1-GLUT1-R153C, pEGFPN1-

GLUT1-N34S, pEGFPN1-GLUT1-Q283R, and pEGFPN1-GLUT1-P485L. DAPI (blue) was used to visualize nuclei, RAB5 staining (red) detected early endosomes. Images are maximum intensity projections of z-stacks. Scale bars 10  $\mu$ m. **(B)** Quantification of colocalization between GLUT1-EGFP and RAB5 signals. For each experimental condition, Pearson's correlation coefficient (PCC) was calculated within the areas of colocalization using Fiji. PCC was recorded for each cell and reported as mean  $\pm$  sem on 30 cells. Differences between WT and mutants (R153C, N34S, Q283R, P485L) were analyzed by unpaired Student's t-test. \* $p < 0.01$

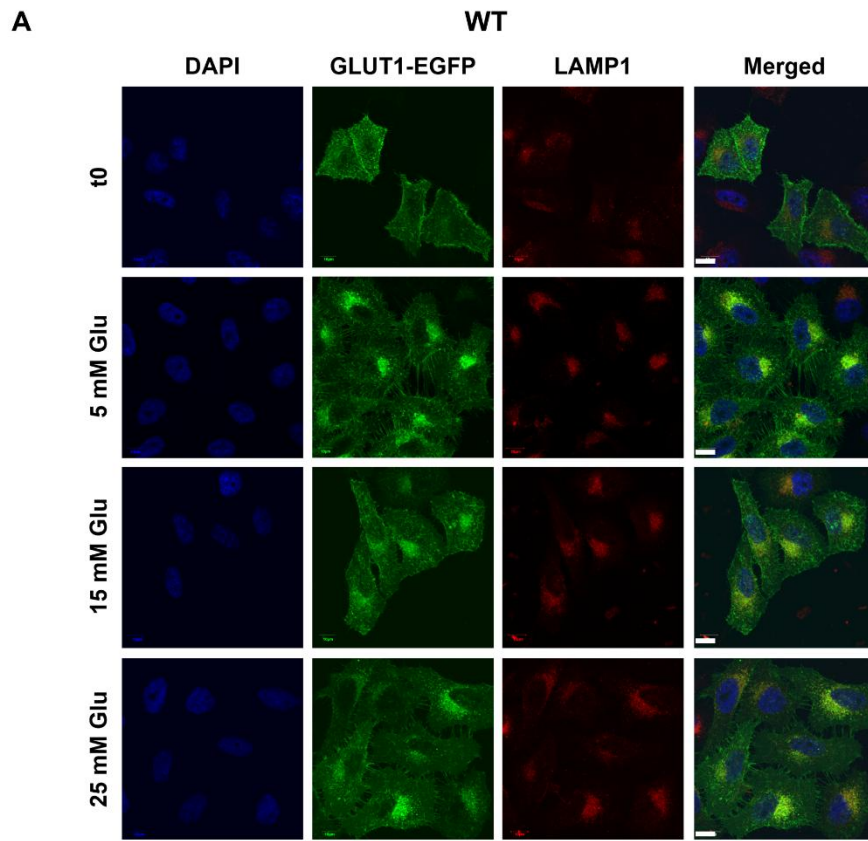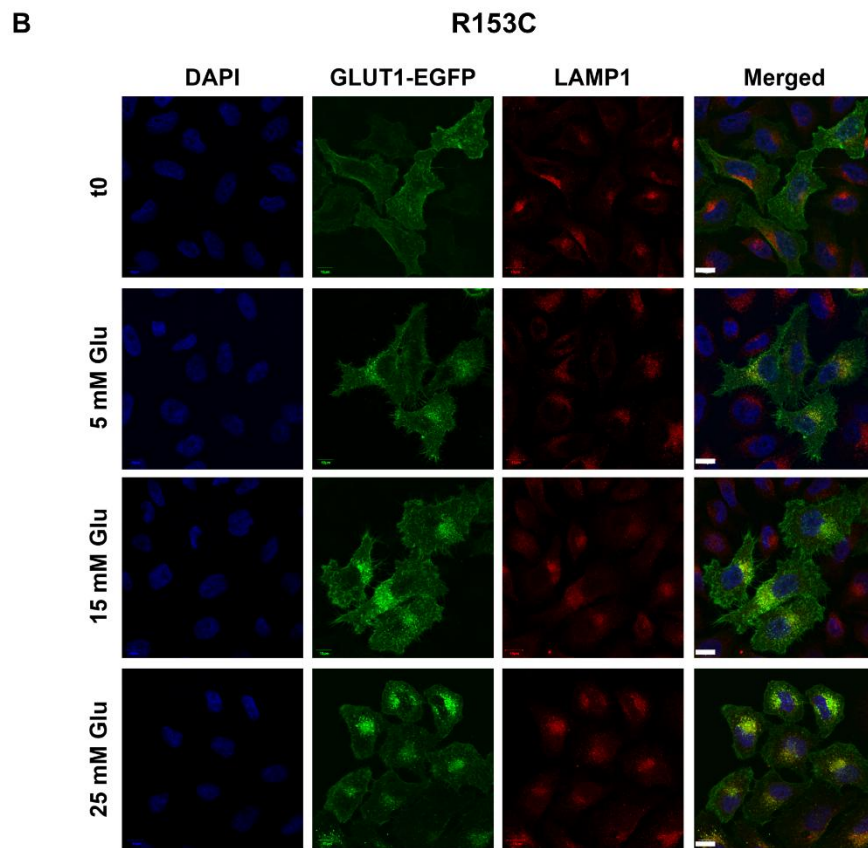

C

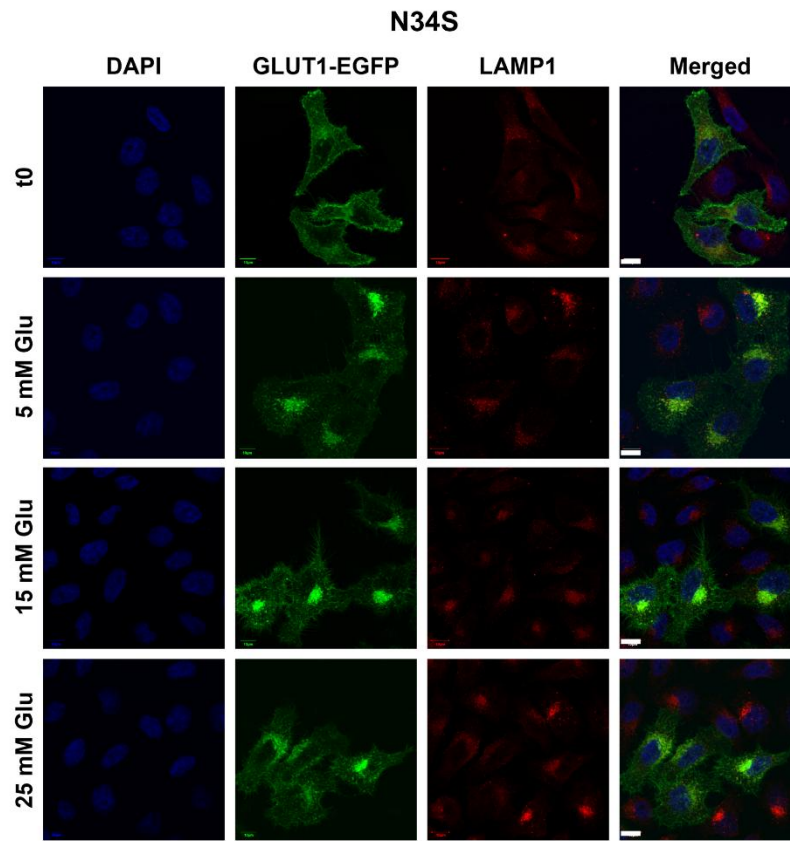

D

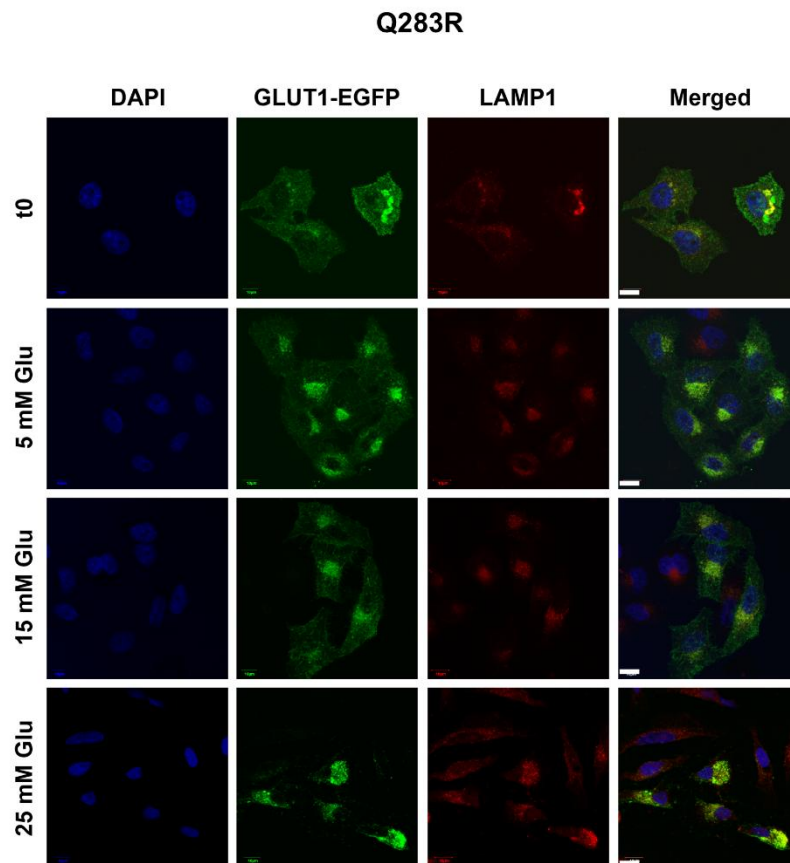

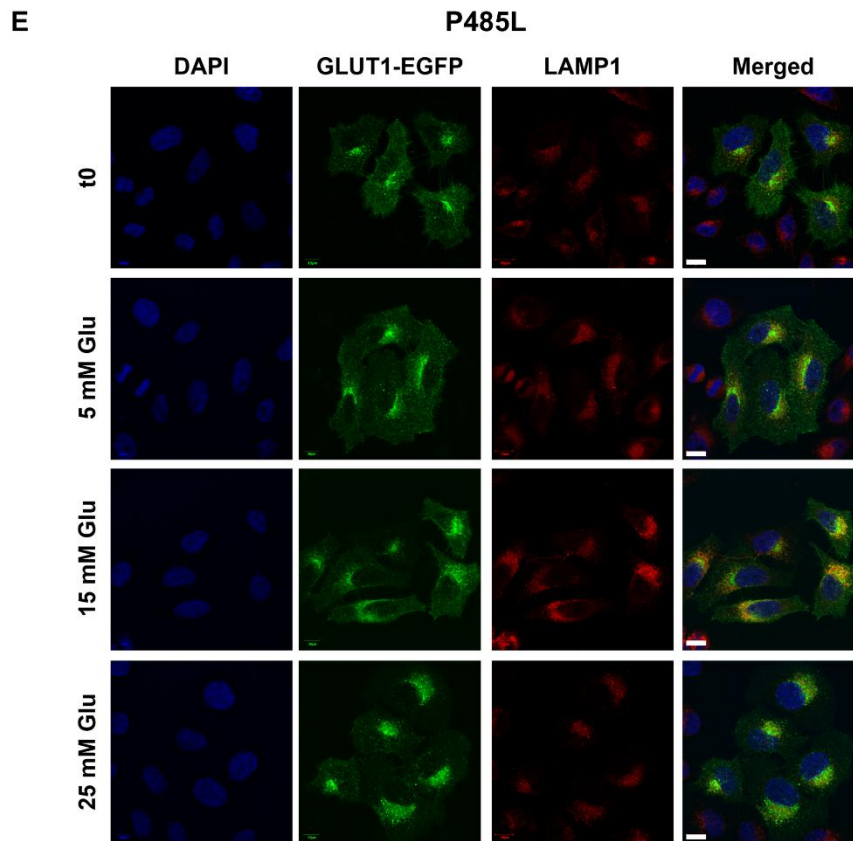

**Supplementary Fig. S10.**

(A) Representative images of immunofluorescence (IF) staining detecting GLUT1-EGFP localization (green) in HeLa cells transfected with pEGFPN1-GLUT1-WT, subjected to glucose deprivation for 24 h and then stopped (t0) or shifted towards different glucose concentrations (5 mM, 15 mM, 25 mM) for 24 h. DAPI (blue) was used to visualize nuclei, LAMP1 staining (red) detected lysosomes. Images are maximum intensity projections of z-stacks. Scale bars 10  $\mu$ m. (B) Representative images of immunofluorescence (IF) staining detecting GLUT1-EGFP localization (green) in HeLa cells transfected with pEGFPN1-GLUT1-R153C, subjected to glucose deprivation for 24 h and then stopped (t0) or shifted towards different glucose concentrations (5 mM, 15 mM, 25 mM) for 24 h. DAPI (blue) was used to visualize nuclei, LAMP1 staining (red) detected lysosomes. Images are maximum intensity projections of z-stacks. Scale bars 10  $\mu$ m. (C) Representative images of immunofluorescence (IF) staining detecting GLUT1-EGFP localization (green) in HeLa cells transfected with pEGFPN1-GLUT1-N34S, subjected to glucose deprivation for 24 h and then stopped (t0) or shifted towards different glucose concentrations (5 mM, 15 mM, 25 mM) for 24 h. DAPI (blue) was used to visualize nuclei, LAMP1 staining (red) detected lysosomes. Images are maximum intensity projections of z-stacks. Scale bars 10  $\mu$ m. (D) Representative images of immunofluorescence (IF) staining detecting GLUT1-EGFP localization (green) in HeLa cells transfected with pEGFPN1-GLUT1-Q283R, subjected to glucose deprivation for 24 h and then stopped (t0) or shifted towards different glucose concentrations (5 mM, 15 mM, 25 mM) for 24 h. DAPI (blue) was used to visualize nuclei, LAMP1 staining (red) detected lysosomes. Images are maximum intensity projections of z-stacks. Scale bars 10  $\mu$ m. (E) Representative images of immunofluorescence (IF) staining detecting GLUT1-EGFP localization (green) in HeLa cells transfected with pEGFPN1-GLUT1-P485L, subjected to glucose deprivation for 24 h and then stopped (t0) or shifted towards different glucose concentrations (5 mM, 15 mM, 25 mM) for 24 h. DAPI (blue) was used to visualize nuclei, LAMP1 staining (red) detected lysosomes. Images are maximum intensity projections of z-stacks. Scale bars 10  $\mu$ m.

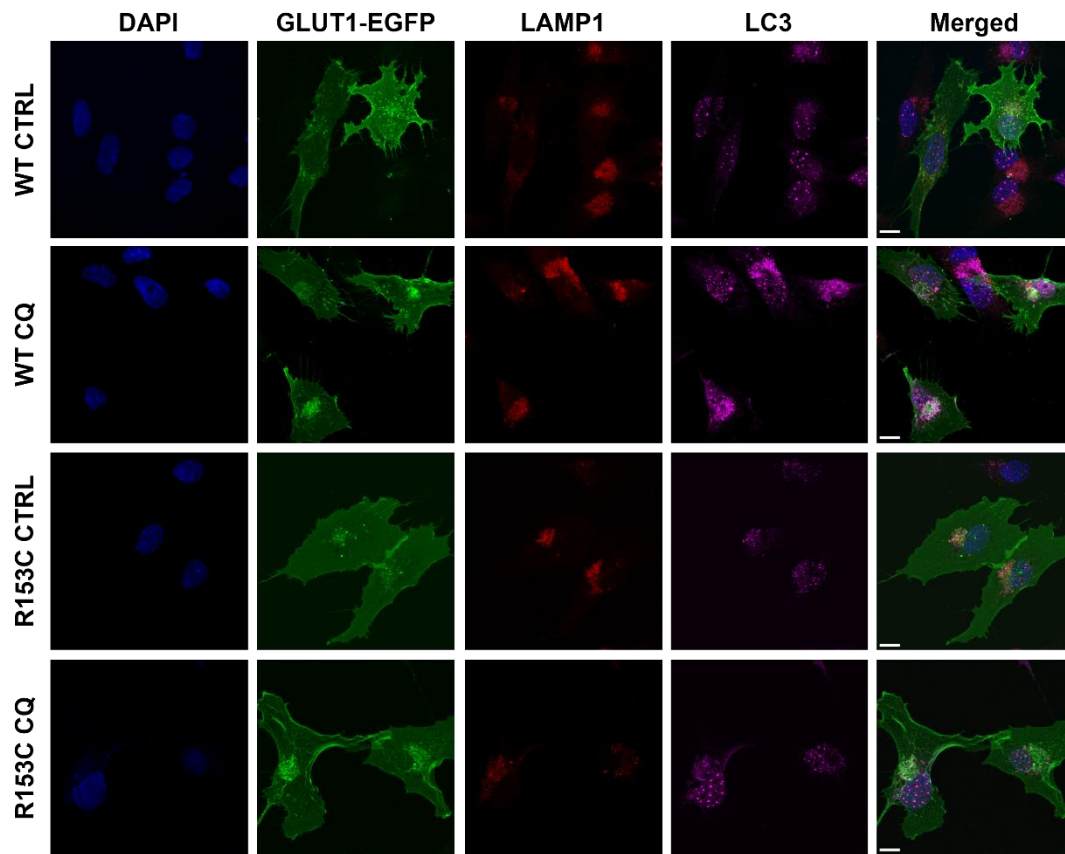

**Supplementary Fig. S11.**

Representative images of immunofluorescence (IF) staining detecting GLUT1-EGFP localization (green) in hCMEC/D3 cells transfected for 24 h with pEGFPN1-GLUT1-WT and pEGFPN1-GLUT1-R153C constructs after chloroquine (CQ) treatment for 2 h or under control condition (CTRL). DAPI (blue) was used to visualize nuclei, LAMP1 (red) and LC3 (magenta) stainings detected lysosomes and autophagosomes, respectively. Images are maximum intensity projections of z-stacks. Scale bars 10  $\mu$ m.
